# Supplementary material for: Stroke and thromboembolic event rates in atrial fibrillation according to different guideline treatment thresholds: A nationwide cohort study
Source: PubMed Central journal article supplement (PMC4893655; doi:10.1038/srep27410), 2016-06-06
Supplement: srep27410-s1.pdf [file srep27410-s1.pdf]

# **Stroke and thromboembolic event rates in atrial fibrillation according to different guideline treatment thresholds: A nationwide study**

Peter Brønnum Nielsen, PhD

Torben Bjerregaard Larsen, PhD

Flemming Skjøth, PhD

Thure Filskov Overvad, MD

Gregory Y.H. Lip, MD

## **Supplemental information**

### List of contents:

eTable 1: Definitions on comorbidity and concomitant medication according to ICD-10 codes and ATC-codes.

eTable 2: Thromboembolic event rates according to different levels of baseline CHA<sub>2</sub>DS<sub>2</sub>-VASc score stratified by methodological approach.

eTable 3: Primary diagnosed thromboembolic event rates according to different levels of baseline CHA<sub>2</sub>DS<sub>2</sub>-VASc score stratified by methodological approach.

eTable 4: Primary diagnosed thromboembolic event rates in relation to different methodological approaches stratified according to cut-off values of stroke risk based on the CHA<sub>2</sub>DS<sub>2</sub>-VASc score.

eTable 5: Thromboembolic event rates according to different levels of baseline CHA<sub>2</sub>DS<sub>2</sub>-VASc score using data from previous five years (2009 – 2014).

**eTable 1:** Definitions on comorbidity and concomitant medication according to ICD-10 codes and ATC-codes. Conditions marked with † was used in the calculation of the CHA<sub>2</sub>DS<sub>2</sub>-VASc score.

| Condition                     | International Classification of Diseases 10th revision (ICD-10) code | Anatomical Therapeutic Chemical (ATC) code |
|-------------------------------|----------------------------------------------------------------------|--------------------------------------------|
| †Congestive heart failure     | I11.0; I13.0; I13.2; I42.0; I50                                      | CO3C                                       |
| †Left ventricular dysfunction | I50.1; I50.9                                                         |                                            |
| †Hypertension                 |                                                                      | See specified definition*                  |
| †Diabetes mellitus            | E10.0; E10.1; E10.9; E11.0; E11.1; E11.9                             | A10                                        |
| †Ischemic stroke              | I63                                                                  |                                            |
| †Systemic embolism            | I74                                                                  |                                            |
| †Transient ischemic disease   | G45                                                                  |                                            |
| †Aortic plaque                | I70.0                                                                |                                            |
| †Peripheral arterial disease  | I70.2-I70.9; I71; I73.9; I74                                         |                                            |
| †Myocardial infarction        | I21-I23                                                              |                                            |
| Atrial fibrillation           | I48                                                                  |                                            |
| <b>Medication</b>             |                                                                      |                                            |
| Dabigatran                    |                                                                      | B01AE07                                    |
| Rivaroxaban                   |                                                                      | B01AE07                                    |

|                                     |                                                                                          |
|-------------------------------------|------------------------------------------------------------------------------------------|
| Apixaban                            | B01AF02                                                                                  |
| Warfarin                            | B01AA03                                                                                  |
| Aspirin                             | B01AC06                                                                                  |
| Beta-blockers                       | C07                                                                                      |
| Alpha adrenergic blockers           | C02A, C02B, C02C                                                                         |
| Non-loop diuretics                  | C02DA, C02L, C03A, C03B, C03D,<br>C03E, C03X, C07C, C07D, C08G,<br>C09BA, C09DA, C09XA52 |
| Vasodilators                        | C02DB, C02DD, C02DG, C04, C05                                                            |
| Calcium channel blockers            | C07F, C08, C09BB, C09DB                                                                  |
| Renin-angiotensin system inhibitors | C09                                                                                      |

---

\* We identified subjects with hypertension† from combination treatment with at least two of the following classes of antihypertensive drugs:

I. Alpha adrenergic blockers (C02A, C02B, C02C)

II. Non-loop diuretics (C02DA, C02L, C03A, C03B, C03D, C03E, C03X, C07C, C07D, C08G, C09BA, C09DA, C09XA52)

III. Vasodilators (C02DB, C02DD, C02DG, C04, C05)

IV. Beta blockers (C07)

V. Calcium channel blockers (C07F, C08, C09BB, C09DB)

VI. Renin-angiotensin system inhibitors (C09).

**eTable 2:** Thromboembolic event rates according to different levels of baseline CHA<sub>2</sub>DS<sub>2</sub>-VASc score stratified by methodological approach.

| CHA <sub>2</sub> DS <sub>2</sub> -VASc score | Formal rate assessment              |              |                       |                                   |              |                       |
|----------------------------------------------|-------------------------------------|--------------|-----------------------|-----------------------------------|--------------|-----------------------|
|                                              | Ischemic stroke                     |              |                       | Ischemic stroke/systemic embolism |              |                       |
|                                              | Events                              | Person-years | Rate/100 person-years | Events                            | Person-years | Rate/100 person-years |
| 0                                            | 432                                 | 74,945       | 0.58                  | 469                               | 74,856       | 0.63                  |
| 1                                            | 982                                 | 101,514      | 0.97                  | 1,031                             | 101,421      | 1.02                  |
| 2                                            | 2,133                               | 114,216      | 1.87                  | 2,245                             | 114,034      | 1.97                  |
| 3                                            | 3,516                               | 123,089      | 2.86                  | 3,730                             | 122,742      | 3.04                  |
| 4                                            | 3,582                               | 90,296       | 3.97                  | 3,803                             | 89,955       | 4.23                  |
| 5                                            | 2,569                               | 46,783       | 5.49                  | 2,753                             | 46,479       | 5.92                  |
| 6                                            | 1,574                               | 21,402       | 7.35                  | 1,698                             | 21,202       | 8.01                  |
| 7                                            | 566                                 | 6,988        | 8.10                  | 611                               | 6,914        | 8.84                  |
| 8                                            | 115                                 | 1,479        | 7.78                  | 126                               | 1,454        | 8.67                  |
| 9                                            | 15                                  | 198          | 7.56                  | 16                                | 198          | 8.07                  |
| CHA <sub>2</sub> DS <sub>2</sub> -VASc score | Conditioning on the future approach |              |                       |                                   |              |                       |
|                                              | Ischemic stroke                     |              |                       | Ischemic stroke/systemic embolism |              |                       |
|                                              | Events                              | Person-years | Rate/100 person-years | Events                            | Person-years | Rate/100 person-years |
| 0                                            | 95                                  | 32,727       | 0.29                  | 107                               | 32,712       | 0.33                  |
| 1                                            | 251                                 | 40,415       | 0.62                  | 261                               | 40,407       | 0.65                  |
| 2                                            | 756                                 | 40,618       | 1.86                  | 792                               | 40,576       | 1.95                  |
| 3                                            | 1,678                               | 52,187       | 3.22                  | 1,766                             | 52,114       | 3.39                  |
| 4                                            | 1,778                               | 40,213       | 4.42                  | 1,890                             | 40,107       | 4.71                  |
| 5                                            | 1,356                               | 22,301       | 6.08                  | 1,427                             | 22,242       | 6.42                  |
| 6                                            | 793                                 | 10,459       | 7.58                  | 857                               | 10,392       | 8.25                  |
| 7                                            | 327                                 | 3,751        | 8.72                  | 349                               | 3,732        | 9.35                  |
| 8                                            | 68                                  | 891          | 7.63                  | 75                                | 882          | 8.51                  |
| 9                                            | 10                                  | 103          | 9.71                  | 11                                | 103          | 10.69                 |
| CHA <sub>2</sub> DS <sub>2</sub> -VASc score | Censoring approach                  |              |                       |                                   |              |                       |
|                                              | Ischemic stroke                     |              |                       | Ischemic stroke/systemic embolism |              |                       |
|                                              | Events                              | Person-years | Rate/100 person-years | Events                            | Person-years | Rate/100 person-years |
| 0                                            | 239                                 | 44,382       | 0.54                  | 261                               | 44,367       | 0.59                  |
| 1                                            | 521                                 | 55,842       | 0.93                  | 541                               | 55,830       | 0.97                  |
| 2                                            | 1,247                               | 55,966       | 2.23                  | 1,305                             | 55,920       | 2.33                  |
| 3                                            | 2,274                               | 64,838       | 3.51                  | 2,411                             | 64,750       | 3.72                  |
| 4                                            | 2,385                               | 48,284       | 4.94                  | 2,547                             | 48,162       | 5.29                  |
| 5                                            | 1,772                               | 25,834       | 6.86                  | 1,900                             | 25,760       | 7.38                  |
| 6                                            | 1,070                               | 12,087       | 8.85                  | 1,159                             | 12,012       | 9.65                  |
| 7                                            | 406                                 | 4,273        | 9.50                  | 443                               | 4,253        | 10.42                 |
| 8                                            | 87                                  | 983          | 8.85                  | 97                                | 973          | 9.97                  |
| 9                                            | 11                                  | 124          | 8.89                  | 12                                | 124          | 9.70                  |

**eTable 3:** Primary diagnosed thromboembolic event rates according to different levels of baseline CHA<sub>2</sub>DS<sub>2</sub>-VASc score stratified by methodological approach.

| CHA <sub>2</sub> DS <sub>2</sub> -VASc score | Formal rate assessment              |              |                       |                                   |              |                       |
|----------------------------------------------|-------------------------------------|--------------|-----------------------|-----------------------------------|--------------|-----------------------|
|                                              | Ischemic stroke                     |              |                       | Ischemic stroke/systemic embolism |              |                       |
|                                              | Events                              | Person-years | Rate/100 person-years | Events                            | Person-years | Rate/100 person-years |
| 0                                            | 360                                 | 75,085       | 0.48                  | 393                               | 75,004       | 0.52                  |
| 1                                            | 784                                 | 101,932      | 0.77                  | 823                               | 101,855      | 0.81                  |
| 2                                            | 1,659                               | 115,033      | 1.44                  | 1,758                             | 114,870      | 1.53                  |
| 3                                            | 2,730                               | 124,323      | 2.20                  | 2,918                             | 124,023      | 2.35                  |
| 4                                            | 2,691                               | 91,798       | 2.93                  | 2,885                             | 91,495       | 3.15                  |
| 5                                            | 1,833                               | 47,998       | 3.82                  | 1,996                             | 47,726       | 4.18                  |
| 6                                            | 1,106                               | 22,155       | 4.99                  | 1,212                             | 21,978       | 5.51                  |
| 7                                            | 395                                 | 7,242        | 5.45                  | 430                               | 7194         | 5.98                  |
| 8                                            | 70                                  | 1,534        | 4.56                  | 78                                | 1515         | 5.15                  |
| 9                                            | 11                                  | 204          | 5.39                  | 11                                | 204          | 5.39                  |
| CHA <sub>2</sub> DS <sub>2</sub> -VASc score | Conditioning on the future approach |              |                       |                                   |              |                       |
|                                              | Ischemic stroke                     |              |                       | Ischemic stroke/systemic embolism |              |                       |
|                                              | Events                              | Person-years | Rate/100 person-years | Events                            | Person-years | Rate/100 person-years |
| 0                                            | 75                                  | 32,759       | 0.23                  | 84                                | 32,748       | 0.26                  |
| 1                                            | 195                                 | 40,509       | 0.48                  | 204                               | 40,501       | 0.50                  |
| 2                                            | 576                                 | 40,810       | 1.41                  | 607                               | 40,775       | 1.49                  |
| 3                                            | 1,306                               | 52,561       | 2.48                  | 1,385                             | 52,501       | 2.64                  |
| 4                                            | 1,354                               | 40,723       | 3.32                  | 1,452                             | 40,629       | 3.57                  |
| 5                                            | 964                                 | 22,862       | 4.22                  | 1,022                             | 22,810       | 4.48                  |
| 6                                            | 567                                 | 10,772       | 5.26                  | 622                               | 10,710       | 5.81                  |
| 7                                            | 234                                 | 3,867        | 6.05                  | 247                               | 3,853        | 6.41                  |
| 8                                            | 40                                  | 929          | 4.30                  | 44                                | 925          | 4.76                  |
| 9                                            | 6                                   | 109          | 5.52                  | 6                                 | 109          | 5.52                  |
| CHA <sub>2</sub> DS <sub>2</sub> -VASc score | Censoring approach                  |              |                       |                                   |              |                       |
|                                              | Ischemic stroke                     |              |                       | Ischemic stroke/systemic embolism |              |                       |
|                                              | Events                              | Person-years | Rate/100 person-years | Events                            | Person-years | Rate/100 person-years |
| 0                                            | 204                                 | 44,432       | 0.46                  | 223                               | 44,418       | 0.50                  |
| 1                                            | 419                                 | 55,966       | 0.75                  | 436                               | 55,957       | 0.78                  |
| 2                                            | 957                                 | 56,196       | 1.70                  | 1,008                             | 56,157       | 1.79                  |
| 3                                            | 1,766                               | 65,274       | 2.71                  | 1,890                             | 65,198       | 2.90                  |
| 4                                            | 1,792                               | 48,860       | 3.67                  | 1,937                             | 48,749       | 3.97                  |
| 5                                            | 1,249                               | 26,432       | 4.73                  | 1,364                             | 26,366       | 5.17                  |
| 6                                            | 746                                 | 12,435       | 6.00                  | 823                               | 12,363       | 6.66                  |
| 7                                            | 288                                 | 4,412        | 6.53                  | 311                               | 4,398        | 7.07                  |
| 8                                            | 53                                  | 1,026        | 5.17                  | 60                                | 1,021        | 5.88                  |
| 9                                            | 7                                   | 130          | 5.40                  | 7                                 | 130          | 5.40                  |

**eTable 4:** Primary diagnosed thromboembolic event rates in relation to different methodological approaches stratified according to cut-off values of stroke risk based on the CHA<sub>2</sub>DS<sub>2</sub>-VASc score.

| Risk stratification          | CHA <sub>2</sub> DS <sub>2</sub> -VASc score | Formal rate assessment |              |                       | Conditioning on the future approach |              |                       | Censoring at oral anticoagulant treatment |              |                       |
|------------------------------|----------------------------------------------|------------------------|--------------|-----------------------|-------------------------------------|--------------|-----------------------|-------------------------------------------|--------------|-----------------------|
|                              |                                              | Events                 | Person-years | Rate/100 person-years | Events                              | Person-years | Rate/100 person-years | Events                                    | Person-years | Rate/100 person-years |
| Truly low risk               | 0 (1 for females)                            | 566                    | 114,771      | 0.49                  | 131                                 | 56,121       | 0.23                  | 331                                       | 73,964       | 0.45                  |
| European treatment threshold | 1 (males)                                    | 650                    | 62,088       | 1.05                  | 157                                 | 17,129       | 0.92                  | 328                                       | 26,412       | 1.24                  |
| U.S. treatment threshold     | 2                                            | 1,758                  | 114,870      | 1.53                  | 607                                 | 40,775       | 1.49                  | 1,008                                     | 56,157       | 1.79                  |
| High risk                    | >2                                           | 9,530                  | 294,135      | 3.24                  | 4778                                | 131,537      | 3.63                  | 6,392                                     | 158,225      | 4.04                  |

**eTable 5:** Thromboembolic event rates according to different levels of baseline CHA<sub>2</sub>DS<sub>2</sub>-VASc score using data from previous five years (2009 – 2014).

| CHA <sub>2</sub> DS <sub>2</sub> -<br>VASc score | Formal rate assessment, N=74,462 |              |                       |                                   |              |                       |
|--------------------------------------------------|----------------------------------|--------------|-----------------------|-----------------------------------|--------------|-----------------------|
|                                                  | Ischemic stroke                  |              |                       | Ischemic stroke/systemic embolism |              |                       |
|                                                  | Events                           | Person-years | Rate/100 person-years | Events                            | Person-years | Rate/100 person-years |
| 0                                                | 103                              | 18,382       | 0.56                  | 111                               | 18,371       | 0.60                  |
| 1                                                | 237                              | 26,202       | 0.90                  | 253                               | 26,174       | 0.97                  |
| 2                                                | 508                              | 29,919       | 1.70                  | 535                               | 29,896       | 1.79                  |
| 3                                                | 855                              | 31,819       | 2.69                  | 905                               | 31,763       | 2.85                  |
| 4                                                | 965                              | 25,478       | 3.79                  | 1,024                             | 25,407       | 4.03                  |
| 5                                                | 787                              | 13,685       | 5.75                  | 828                               | 13,640       | 6.07                  |
| 6                                                | 534                              | 6,692        | 7.98                  | 565                               | 6,647        | 8.50                  |
| 7                                                | 182                              | 2,320        | 7.84                  | 195                               | 2,305        | 8.46                  |
| 8                                                | 37                               | 609          | 6.07                  | 40                                | 609          | 6.57                  |
| 9                                                | 3                                | 78           | 3.84                  | 3                                 | 78           | 3.84                  |
